# Supplementary material
Source: publisher figshare collection journal article supplement (https://geolsoc.figshare.com/ndownloader/files/34042544)
Supplement: Supplementary file 1 [file 34042544]

## Sheet: Sheet1
	Table S2. EPMA analyses of pseudotachylytes matrices. Analyses are expressed in oxide weight % with Ca/K and Cl/K ratios in atomic weight %.
	Sample	PT-24											FG-22															PT-23						PT-46
	domain												PT1	PT1	PT1	PT1	PT1	PT1	PT1	PT2	PT2	PT2	PT2	PT2	PT2	PT2		PT	PT	PT	PT	PT		pl-rich	pl-rich	pl-rich	pl-rich	pl-rich	pl-rich
	SiO2	44.99	46.55	46.78	45.59	45.63	46.26	48.79	42.13	42.34	45.06		42.34	42.6	41.98	41.4	44.39	42.17	41.98	45.91	45.69	46.36	44.6	46.73	46.44	46.93		56.15	55.7	55.04	55.54	55.44		58.56	59.27	59.14	56.66	59.67	61.72
	TiO2	0.14	0.61	0.32	0.31	0.31	0.29	0.28	1.76	1.98	1.29		0.63	0.81	0.67	0.6	0.53	0.4	0.39	0.71	0.74	0.76	0.71	0.76	0.83	0.67		0.8	0.83	0.93	0.91	0.89		0.4	0.13	0.38	0.27	0.54	0.24
	Al2O3	23.52	25.68	25.21	26.38	25.27	23.41	25.66	26.42	27.38	25.42		16.88	16.59	14.05	13.05	17.36	16.39	16.22	22.84	23.17	23.06	20.43	23.5	23.63	23.77		20.03	19.37	20.32	19.56	20.3		18.31	22.17	20.76	23.63	22.16	21.31
	Cr2O3	0	0	0.04	0.07	0	0	0	0.03	0.02	0		0	0	0	0	0	0	0	0	0	0	0	0	0	0		0	0	0	0	0		0.02	0.02	0.02	0	0.06	0.03
	FeO	11.75	9.34	9.17	9.28	9.85	11.5	8.9	8.99	6.94	8.23		15.49	16.16	19.02	19.24	16.01	16.87	16.64	9.71	9.37	9.67	12.44	8.92	8.86	8.56		6.49	7.26	6.29	7.09	6.19		4.98	0.82	2.75	2.78	0.88	0.44
	MnO	0.2	0.18	0.19	0.12	0.16	0.13	0.18	0.15	0.11	0.08		0.3	0.34	0.48	0.42	0.43	0.5	0.41	0.24	0.26	0.2	0.3	0.25	0.28	0.22		0.19	0.22	0.14	0.24	0.13		0.1	0.02	0.05	0.08	0.05	0.02
	MgO	4.38	3.21	3.23	3.4	3.43	4.11	3.38	3.04	2.17	3.04		6.12	6.34	8.28	8.36	6.6	7.24	7.07	3.95	3.83	3.96	4.87	3.77	3.75	3.59		2.7	2.99	2.79	2.85	2.55		1.98	0.26	0.98	0.93	0.27	0.13
	CaO	1.34	3.89	1.47	2.22	3.39	1.56	1.75	9.36	11.79	6.32		1.11	1.11	1.09	1.49	1.94	1.54	1.43	1.24	1.17	1.13	1.04	1.22	1.2	1.15		4.82	4.41	4.89	4.72	4.98		2.16	5.21	3.7	7.88	5.4	3.74
	Na2O	0.05	0.17	0.04	0.07	0.1	0.2	0.03	0.06	0.03	0.1		0.05	0.05	0.04	0.02	0.92	0.05	0.01	0.05	0.07	0.09	0.1	0.09	0.11	0.14		4.39	4.23	4.42	4.22	4.06		1.53	2.81	2.53	3.72	3.27	3.07
	K2O	7.7	7.78	9.05	8.64	8.01	8.63	8.3	5.22	4.23	6.54		7	6.92	7.02	6.8	6.59	7.26	7.19	8.57	8.61	8.77	7.45	8.65	8.73	8.84		3.23	3.35	3.16	3.32	3.6		11.3	8.16	9.5	4.29	7.28	9
	Cl	0.01	0.02	0.03	0.01	0.03	0.04	0.01	0.03	0.01	0.03		0.02	0.03	0.05	0.07	0	0	0	0	0	0	0	0	0	0		0.05	0.04	0.02	0.02	0.05		0.05	0	0.03	0.03	0.03	0
	Total	94.08	97.43	95.53	96.09	96.18	96.13	97.28	97.19	97	96.11		89.94	90.95	92.68	91.45	94.77	92.42	91.34	93.22	92.91	94	91.94	93.89	93.83	93.87		98.85	98.4	98	98.47	98.19		99.39	98.87	94.08	100.27	99.61	99.7
	Ca/K	0.149824	0.430464	0.139841	0.221211	0.364363	0.155626	0.181521	1.54373	2.39961	0.831968		0.136519	0.138097	0.133677	0.188645	0.253445	0.182621	0.171228	0.124568	0.11699	0.110929	0.120183	0.121426	0.118341	0.111999		1.28473	1.13334	1.33226	1.22397	1.19095		0.164567	0.549686	0.335309	1.58138	0.638601	0.357764
	Cl/K	0.00156442	0.00309666	0.00399315	0.00139421	0.00451162	0.00558332	0.00145133	0.006923	0.00284776	0.0055257		0.00344172	0.00522226	0.00857978	0.0124003	0	0	0	0	0	0	0	0	0	0		0.0186471	0.0143833	0.00762406	0.00725664	0.0167306		0.0053301	0	0.003804	0.00842379	0.00496402	0
